# Supplementary material for: Ano1 mediates pressure-sensitive contraction frequency changes in mouse lymphatic collecting vessels
Source: PubMed Central journal article supplement — J Gen Physiol. 2019 Mar 12;151(4):532–54. doi: 10.1085/jgp.201812294 (PMC6445586; doi:10.1085/jgp.201812294), 2019-03-12
Supplement: JGP_201812294_sm.pdf [file JGP_201812294_sm.pdf]

## Supplemental material

Zawieja et al., <https://doi.org/10.1085/jgp.201812294>

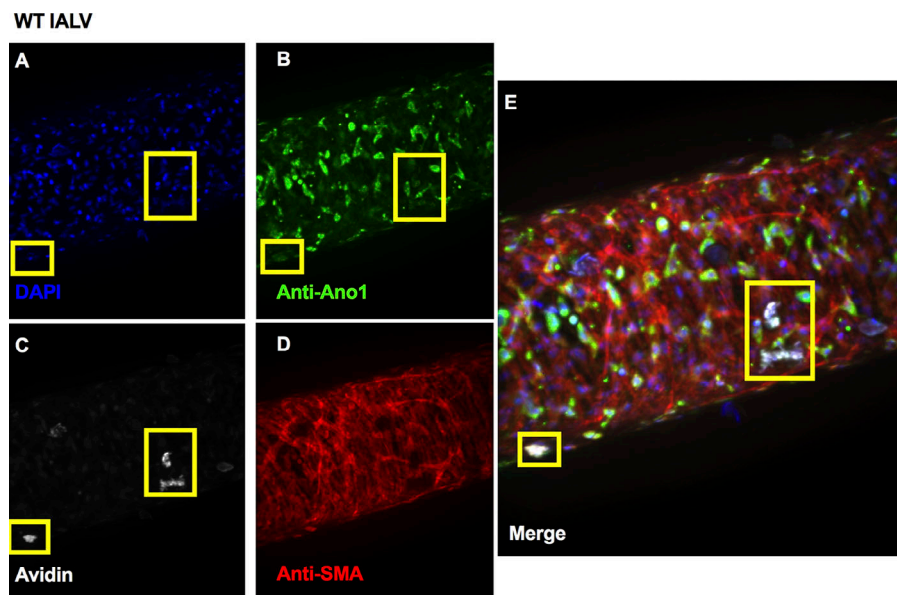

Figure S1. **Mast cells are a minor population of Ano1<sup>+</sup> cells in the IALV adventitia.** Representative immunofluorescence maximal projection of an IALV stained for 4',6-diamidino-2-phenylindole (blue; A), Ano1 (green; B), SMA to label LMCs (red; C), and avidin (white; D) to label mast cells and the corresponding merged image (E). Images were taken at 20 $\times$  objective magnification. Yellow boxes denote overlap in Ano1 and avidin signal.
